# Supplementary material for: Flexible ribbon-shaped coaxial electrical conductive nanocable array endowed with magnetism and photoluminescence
Source: Royal Society of Chemistry journal article supplement (doi:10.1039/c4ra14908d), 2014-12-02
Supplement: c4ra14908d1.pdf [file c4ra14908d1.pdf]

## Electronic Supplementary Information (ESI)

### Flexible Ribbon-shaped Coaxial Electrical Conductive Nanocables Array Endowed with Magnetism and Photoluminescence

Qianli Ma, Jinxian Wang, Xiangting Dong,\* Wensheng Yu and Guixia Liu

*Key Laboratory of Applied Chemistry and Nanotechnology at Universities of Jilin Province,*

*Changchun University of Science and Technology, Changchun 130022. Fax: 86 0431 85383815;*

*Tel: 86 0431 85582574; E-mail: dongxiangting888@163.com*

#### Assembly of the modified coaxial spinneret

Of the modified coaxial spinneret, a stainless-steel needle was connected to the inner plastic syringe just like the traditional one; the outer stainless-steel needle of the traditional coaxial spinnerets was replaced by a plastic nozzle, and connected to the outer plastic syringe. The tip of the inner stainless-steel needle was shortened 2 cm from the tip of the outer plastic nozzle.

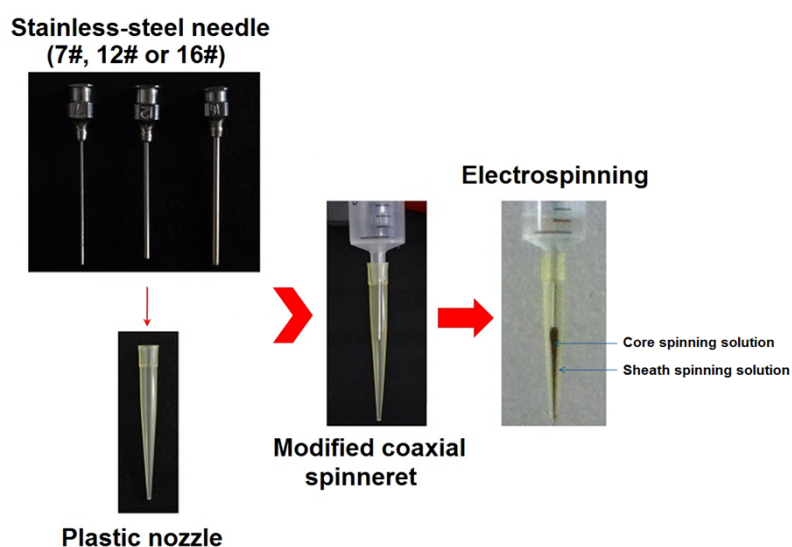

Fig. S1 Assembly diagram of the modified coaxial spinneret

### Formation mechanism of electrospun ribbon-shaped coaxial nanocable

As seen in **Figure S2**, the coaxial jet was cylindrical in shape at the time when it was stretched out of the Taylor cone by electric field force, and the positive charges were uniformly distributed in the jet. After that, because the coaxial nanocable swang in the air due to the instability of electrospinning process, a tiny deformation was occurred in the cross section of the jet. In this situation, the positive charges concentrated at the sections where had larger curvature radius, and a Coulombic repulsive force was produced to stretch the jet towards ribbon shape. If the surface tension of the jet (maintain the jet in cylindrical shape) could not counteract the Coulombic repulsive force, ribbon-shaped coaxial nanocable was formed.

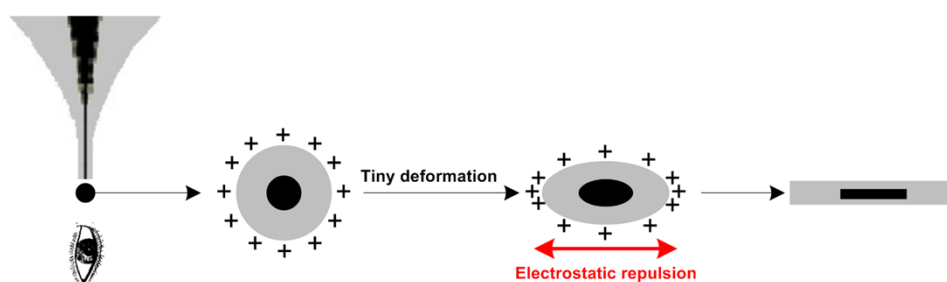

**Fig. S2** Schematic diagram of the formation mechanism for electrospun ribbon-shaped coaxial nanocable

### Calculation of cross-sectional area of the core of a ribbon-shaped coaxial nanocable

**Figure S3** shows the schematic diagram of the cross section of a ribbon-shaped coaxial nanocable, in which  $T_s$ ,  $W_s$ ,  $T_c$  and  $W_c$  respectively represent the thickness of the single ribbon-shaped coaxial nanocable, the width of the single ribbon-shaped coaxial nanocable, the thickness of the core and the width of the core of the ribbon-shaped coaxial nanocable. The cross-sectional area ( $A$ ) of the core can be calculated by the formula  $A = T_c \times W_c$  (**Equation S1**). However, the thickness of the core ( $T_c$ ) is hard to measure using existing measurement technique, and thus, other method of calculating  $A$  is needed.

Throughout the formation process of ribbon-shaped coaxial nanocable, both the core and

sheath were synchronously stretched by Coulombic repulsive force, so  $W_c$ ,  $T_c$ ,  $W_s$  and  $T_s$  followed the relationship  $T_c/T_s=W_c/W_s$  (**Equation S2**). Then the formula  $A= T_s \times W_c^2/W_s$  can be obtained by combining **Equation S1** and **S2**, in which  $T_s$ ,  $W_s$  and  $W_c$  can be measured by SEM and BM observation.

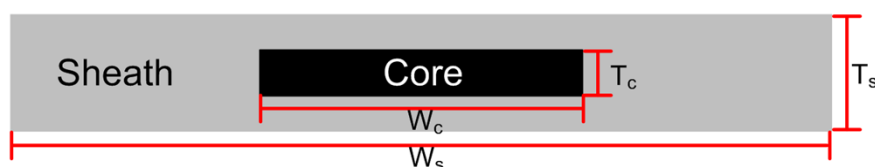

**Fig. S3** Schematic diagram of the cross section of a ribbon-shaped coaxial nanocable

### Assembly of the modified coaxial spinneret

**Figure S4** shows the schematic diagram of electrical property of ribbon-shaped coaxial conductive nanocables array.

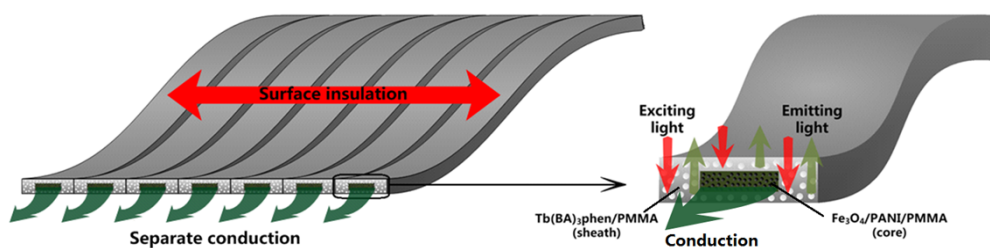

**Fig. S4** Schematic diagram of electrical property of ribbon-shaped coaxial conductive nanocables array
